RESEARCH ARTICLE

# Differential Response of Coral Assemblages to Thermal Stress Underscores the Complexity in Predicting Bleaching Susceptibility

Loke Ming Chou<sup>1</sup>✉, Tai Chong Toh<sup>1</sup>✉\*, Kok Ben Toh<sup>1</sup>, Chin Soon Lionel Ng<sup>1</sup>, Patrick Cabaitan<sup>1</sup>, Karenne Tun<sup>2</sup>, Eugene Goh<sup>3</sup>, Lutfi Afiq-Rosli<sup>1</sup>, Daisuke Taira<sup>1</sup>, Rosa Celia Poquita Du<sup>1</sup>, Hai Xin Loke<sup>1</sup>, Aizat Khalis<sup>4</sup>, Jinghan Li<sup>4</sup>, Tiancheng Song<sup>5</sup>

**1** Tropical Marine Science Institute, National University of Singapore, 18 Kent Ridge Road, Singapore, 119227, **2** National Biodiversity Centre, National Parks Board, 1 Cluny Road, Singapore, 259569, **3** DHI Water and Environment, 1 Cleantech Loop, 03-04 CleanTech One, Singapore, 637141, **4** Department of Biological Sciences, National University of Singapore, 14 Science Drive 4, Singapore, 117543, **5** Maritime and Port Authority of Singapore, 460 Alexandra Road PSA Building, Singapore, 119963

✉ These authors contributed equally to this work.

\* [Taichong.toh@nus.edu.sg](mailto:Taichong.toh@nus.edu.sg)

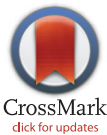

OPEN ACCESS

**Citation:** Chou LM, Toh TC, Toh KB, Ng CSL, Cabaitan P, Tun K, et al. (2016) Differential Response of Coral Assemblages to Thermal Stress Underscores the Complexity in Predicting Bleaching Susceptibility. PLoS ONE 11(7): e0159755. doi:10.1371/journal.pone.0159755

**Editor:** Chaolun Allen Chen, Biodiversity Research Center, Academia Sinica, TAIWAN

**Received:** March 1, 2016

**Accepted:** July 6, 2016

**Published:** July 20, 2016

**Copyright:** © 2016 Chou et al. This is an open access article distributed under the terms of the [Creative Commons Attribution License](https://creativecommons.org/licenses/by/4.0/), which permits unrestricted use, distribution, and reproduction in any medium, provided the original author and source are credited.

**Data Availability Statement:** All relevant data are within the paper and its Supporting Information files.

**Funding:** This work was funded by the Maritime and Port Authority of Singapore (Grant number: R347-000-215-490, <http://www.mpa.gov.sg/>) granted to LMC. This study is part of the project "Enhancing Singapore's Coral Reef Ecosystem in a Green Port". The funders had no role in study design, data collection and analysis, decision to publish, or preparation of the manuscript. One of the authors, EG is employed by a commercial company: DHI Water and Environment. The funder provided support

## Abstract

Coral bleaching events have been predicted to occur more frequently in the coming decades with global warming. The susceptibility of corals to bleaching during thermal stress episodes is dependent on many factors and an understanding of these underlying drivers is crucial for conservation management. In 2013, a mild bleaching episode ensued in response to elevated sea temperature on the sediment-burdened reefs in Singapore. Surveys of seven sites highlighted variable bleaching susceptibility among coral genera—*Pachyseris* and *Podabacia* were the most impacted (31% of colonies of both genera bleached). The most susceptible genera such as *Acropora* and *Pocillopora*, which were expected to bleach, did not. Susceptibility varied between less than 6% and more than 11% of the corals bleached, at four and three sites respectively. Analysis of four of the most bleached genera revealed that a statistical model that included a combination of the factors (genus, colony size and site) provided a better explanation of the observed bleaching patterns than any single factor alone. This underscored the complexity in predicting the coral susceptibility to future thermal stress events and the importance of monitoring coral bleaching episodes to facilitate more effective management of coral reefs under climate change.

## Introduction

Thermal stress events that cause disturbances to natural ecosystems are predicted to occur every ten to twenty years [1,2]. Prolonged elevation of sea temperatures exerts tremendous stress on coral reefs, and scleractinian corals are especially susceptible to such impacts. Photo-

in the form of salaries for EG, but did not have any additional role in the study design, data collection and analysis, decision to publish, or preparation of the manuscript. The specific roles of these authors are articulated in the 'author contributions' section.

**Competing Interests:** One of the authors, EG is employed by a commercial company: DHI Water and Environment. This commercial affiliation does not alter the authors' adherence to PLOS ONE policies on sharing data and materials.

inhibition and the subsequent expulsion of symbiotic algae in response to sustained temperature elevation lead to coral bleaching [3]. Consequently, the reduction of photosynthetic activity creates an energy deficit which cannot be fully compensated by heterotrophic feeding alone [4]. This disruption of the coral-zooxanthellae symbiotic relationship has been linked to large-scale coral mortality [5]. Major bleaching episodes can decimate up to 70% of the corals within three months of the onset of bleaching and can impact hundreds of kilometers of reefs [5].

Not all coral genera bleach to the same extent during thermal stress events and susceptibility variation can play an important role in shaping the resultant community structure and species diversity of a reef [6]. The different responses are determined by a range of intrinsic factors, such as taxon, growth form, and colony size. For example, Marshall and Baird (2000) [6] reported that acroporids and pocilloporids are the most susceptible to thermal stress, while corals of the genera *Cyphastrea*, *Turbinaria* and *Galaxea* are among the most resistant. Branching corals are also more prone to bleaching due to reduced coral tissue thickness and morphology-dependent mass transfer of heat and metabolites [7]. In addition, smaller coral colonies withstood thermal stress better due to the higher mass transfer rates as compared to larger colonies [8].

The variability in bleaching prevalence is also influenced by a myriad of environmental factors, including the magnitude of thermal stress and irradiance [9,10], efficiency of water circulation for heat dissipation [11,12] and the thermal stress history of the locality [13]. While some generalizations on coral bleaching susceptibility have been made [6, 7], the interactions among these factors are potentially more complex than currently assumed. For instance, observations of the trends in bleaching susceptibility during the 2010 mass bleaching event suggested that fast-growing branching corals may not be as vulnerable to thermal stress as is commonly perceived [14].

There is a growing body of work documenting coral community responses to bleaching in recent years [13,14,15]. However, most appear to have focused on major bleaching events where over 50% of the colonies had been impacted [6,14,16]. Punctuating the major episodes are minor bleaching events where effects are localized, with less than 25% bleaching observed on the reef [16,17]. Unlike major bleaching events, corals that bleach during minor episodes tend to be those which are especially vulnerable to heat stress [16]. Yet, there is little research on the response of coral assemblages during these minor events [16,17]. Additionally, with the effects of future mass bleaching episodes likely exacerbated by multiple stressors [2,15], it is pertinent to examine how reefs under chronic disturbance by human activities will fare under warming sea surface temperature. There is a need to examine coral bleaching episodes at a much finer scale, to enhance our understanding of the mechanisms underlying coral susceptibility to thermal stress.

Singapore's reefs persist in an environment which has been impacted by intensive coastal development and land reclamation for over five decades [18]. Today, they are dominated by foliose and massive corals that are tolerant to high sedimentation and low light conditions [18,19,20]. Contemporary sedimentation rates can be as high as  $20 \text{ mg cm}^{-2} \text{ day}^{-1}$  [20], but the reefs continue to support a rich diversity of corals [21]. They were not spared from widespread bleaching-related coral mortality caused by sustained elevated sea surface temperatures in 1998 and 2010 [14,22]. More recently, between June to July 2013, sea surface temperature (SST) in Singapore ( $30.6^\circ\text{C}$ ) [23] exceeded the maximum monthly mean ( $29.8^\circ\text{C}$ ) [23], and an average of 6% bleaching at multiple reefs was recorded (this study). The number of bleached colonies was less than 25%, thus the bleaching episode was considered minor [16]. In the present study, we surveyed the southern offshore reefs to examine if there were spatial variations in the bleaching patterns and if there were differential responses to bleaching among coral genera.

## Materials and Methods

### Study sites

Surveys were carried out at seven sites fringing the offshore islands south of mainland Singapore—Hantu (01°13.645'N, 103°44.780'E), Semakau (01°11.51'N, 103°45.32'E), Kusu (1°13.32'N, 103°51.33'E), Subar Darat (1°12.54'N, 103°49.53'E), Satumu (1°9.36'N, 103°44.24'E), Sultan Shoal North (1°14.23'N, 103°38.55'E) and South (1°14.21'N, 103°38.52'E) (Fig 1). A research permit for this work was granted by the Singapore government through the National Parks Board.

### Coral bleaching surveys

The surveys were conducted from May to July 2013 and coincided with the ocean warming event that occurred from June to July 2013 (30.6°C) [23]. At each site, surveys were carried out by establishing six 20-m transects at a depth of 2 to 7 m on the reef. Along each replicate transect, photographs of ten 1 m x 1 m quadrats (each spaced 1 m apart) were taken (total of 60 quadrats per reef). All hard corals within the quadrats were enumerated and identified to

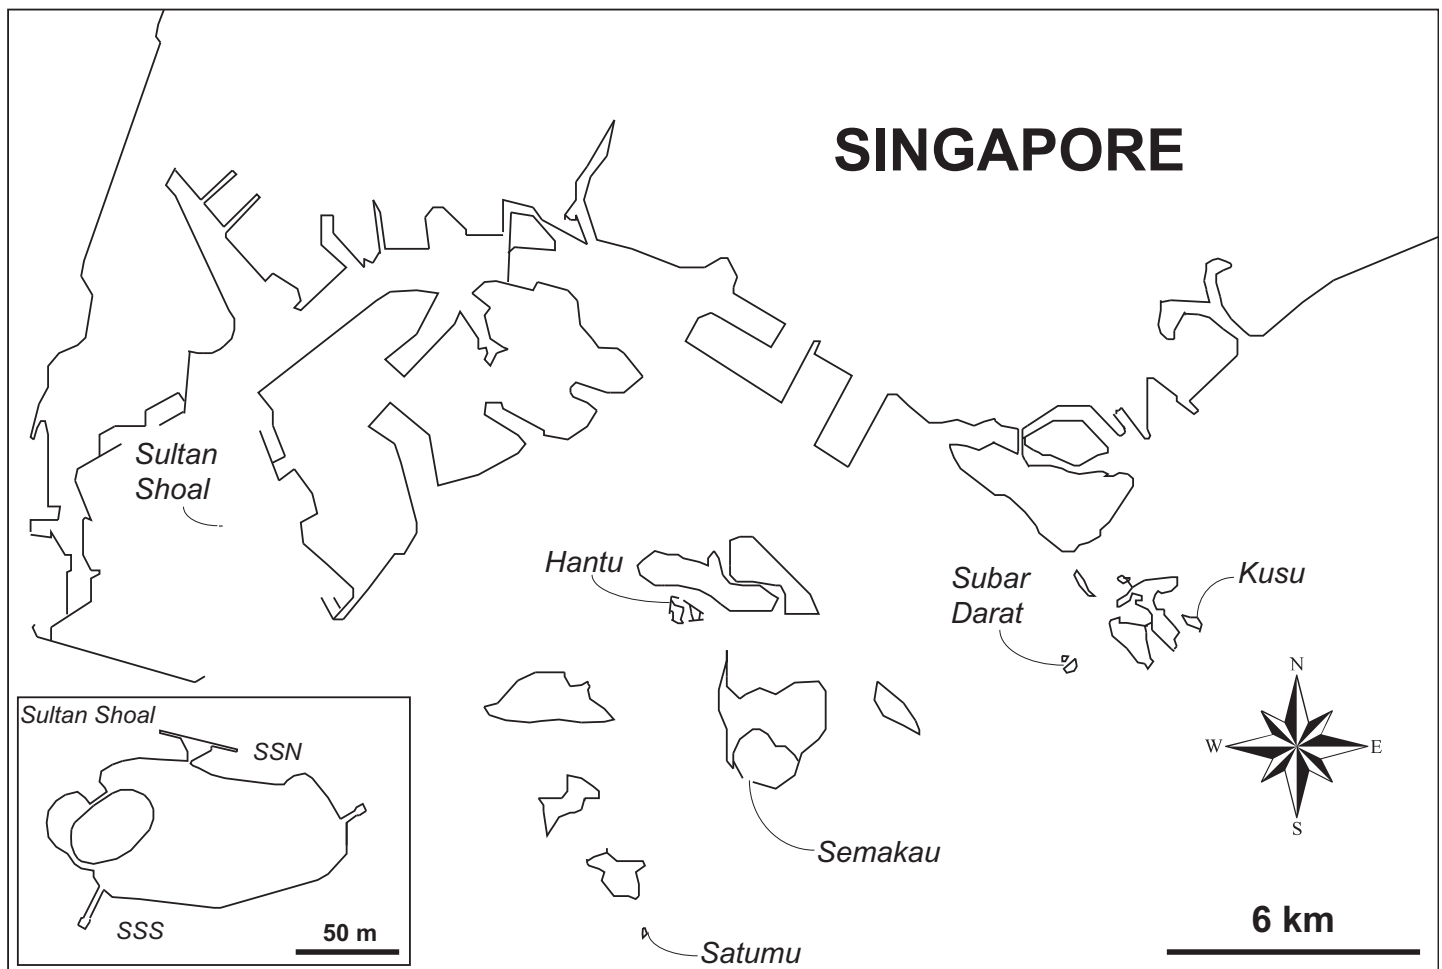

**Fig 1. Map of the southern islands of Singapore, with inset showing Sultan Shoal.** The seven study sites are indicated (SSN = Sultan Shoal North; SSS = Sultan Shoal South).

doi:10.1371/journal.pone.0159755.g001

genus initially following Veron, 2000 [24]. In line with recent developments in scleractinian taxonomy, the genus names were updated following Wallace et al. 2012 [25] for *Acropora*; Ben-zoni et al. 2010 [26] for *Psammocora*; Budd et al. 2012 [27], Huang et al. 2014 [28] for Meruli-nidae, Lobophylliidae and Diploastraeidae. For Fungiidae, the classification followed Gittenberger et al. 2011 [29] and Hoeksema 2009 [30] except for the solitary free-living mem-bers such as *Fungia* (Veron, 2000 [24]). These were categorised as “other solitary fungiids” as voucher specimens were not collected for identification to reflect the latest taxonomic name changes. For all other taxa that were yet to be revised, identification followed Veron, 2000 [24].

For each colony, the proportion of the total area that bleached was classified as two levels of severity: (1) 1–50% and (2) 51–100% following Guest *et al.* (2012) [14]. Coral bleaching suscep-tibility, defined as the percentage of colonies that bleached relative to the total number of col-onies of a particular genus, was then calculated for each transect [31]. The maximum diameters of the bleached colonies were measured using the software CPCe (Coral Point Count with Excel Extension).

## Factors driving the variation in bleaching response

To examine the drivers of differential bleaching response, three factors—coral genus, site, and size (maximum colony diameter) of the bleached corals were examined. Data from four coral genera with the most number of bleached colonies (*Pachyseris*, *Dipsastraea*, *Pectinia* and *Por-ites*) were analysed and the corresponding bleaching responses (bleached and non-bleached) were modelled using generalized linear model calculated with binary logistic regression in R 2.14.2. Model selection was done using the Akaike Information Criterion (AIC). Models with lower AIC values were selected which corresponded to the final model that best explained the data.

## Results

### Coral bleaching response

A total of 2648 colonies were observed. As 6.1% (162) of the colonies were bleached, this quali-fied as a minor episode. Twenty-three of the 37 coral genera showed signs of bleaching (Table 1, Fig 2). Among the genera, *Pachyseris* and *Podabacia* had the highest bleaching sus-ceptibility of 31% and 30.8% respectively and collectively accounted for 39.5% (64) of the total number of bleached colonies. The remaining bleached colonies (60.5%) were distributed across the other 21 genera, which had bleaching susceptibilities of between 1.2% and 16.7%. Fourteen genera did not bleach during this episode, including *Acropora* and *Pocillopora*. Bleaching sever-ity was evenly distributed between Levels 1 (<50% bleached) and 2 (>50% bleached), with 54.3% of the corals in the former and 45.7% in the latter categories.

Of all the sites surveyed in 2013, corals at Sultan Shoal North, Hantu and Subar Darat had the highest coral bleaching susceptibilities of 12.4%, 11.7% and 11.5% respectively (Table 2). The number of bleached colonies (98) recorded from these sites accounted for more than 60% of the total bleached coral count while the remaining sites had bleaching susceptibilities of between 2.3% to 6.0%. Although Sultan Shoal South is located just 200 m from Sultan Shoal North on the same island, the former was one of the sites with corals of the lowest susceptibility (2.5%).

The order of susceptibility among taxa varied across sites and this was clearly observed in the bleaching responses of the four genera with the largest number of bleached colonies (Fig 3). At Sultan Shoal North where bleaching susceptibility was the highest, *Pectinia* was the most bleached, followed by *Porites* and *Dipsastraea*. However, the order was reversed at Hantu (i.e.

**Table 1. Bleaching response of coral genera from seven study sites during a minor bleaching episode in Singapore in 2013.**

| Genera                  | n           | Number of bleached colonies | Bleaching susceptibility (%) | Number of corals in Level 1 (<50% bleached) | Number of corals in Level 2 (>50% bleached) |
|-------------------------|-------------|-----------------------------|------------------------------|---------------------------------------------|---------------------------------------------|
| <i>Pachyseris</i>       | 200         | 62                          | 31.0                         | 37                                          | 25                                          |
| <i>Podabacia</i>        | 13          | 4                           | 30.8                         | 2                                           | 2                                           |
| <i>Lithophyllon</i>     | 18          | 3                           | 16.7                         | 1                                           | 2                                           |
| <i>Goniastrea</i>       | 7           | 1                           | 14.3                         | 1                                           | 0                                           |
| <i>Platygyra</i>        | 85          | 9                           | 10.6                         | 6                                           | 3                                           |
| <i>Porites</i>          | 105         | 10                          | 9.5                          | 5                                           | 5                                           |
| <i>Diploastrea</i>      | 12          | 1                           | 8.3                          | 1                                           | 0                                           |
| <i>Goniopora</i>        | 69          | 5                           | 7.2                          | 2                                           | 3                                           |
| <i>Pectinia</i>         | 421         | 27                          | 6.4                          | 15                                          | 12                                          |
| <i>Coscinaraea</i>      | 33          | 2                           | 6.1                          | 1                                           | 1                                           |
| <i>Lobophyllia</i>      | 19          | 1                           | 5.3                          | 1                                           | 0                                           |
| <i>Dipsastraea</i>      | 215         | 10                          | 4.7                          | 3                                           | 7                                           |
| <i>Pavona</i>           | 72          | 3                           | 4.2                          | 2                                           | 1                                           |
| <i>Symphyllia</i>       | 48          | 2                           | 4.2                          | 1                                           | 1                                           |
| <i>Hydnophora</i>       | 24          | 1                           | 4.2                          | 1                                           | 0                                           |
| <i>Turbinaria</i>       | 104         | 3                           | 2.9                          | 3                                           | 0                                           |
| <i>Montipora</i>        | 117         | 3                           | 2.6                          | 1                                           | 2                                           |
| Other solitary fungiids | 90          | 2                           | 2.2                          | 0                                           | 2                                           |
| <i>Merulina</i>         | 290         | 6                           | 2.1                          | 3                                           | 3                                           |
| <i>Astreopora</i>       | 55          | 1                           | 1.8                          | 0                                           | 1                                           |
| <i>Echinopora</i>       | 61          | 1                           | 1.6                          | 0                                           | 1                                           |
| <i>Leptoria</i>         | 65          | 1                           | 1.5                          | 1                                           | 0                                           |
| <i>Favites</i>          | 324         | 4                           | 1.2                          | 1                                           | 3                                           |
| <i>Alveopora</i>        | 50          | 0                           | 0                            | -                                           | -                                           |
| <i>Galaxea</i>          | 23          | 0                           | 0                            | -                                           | -                                           |
| <i>Cyphastrea</i>       | 22          | 0                           | 0                            | -                                           | -                                           |
| <i>Ctenactis</i>        | 21          | 0                           | 0                            | -                                           | -                                           |
| <i>Oxypora</i>          | 20          | 0                           | 0                            | -                                           | -                                           |
| <i>Mycedium</i>         | 17          | 0                           | 0                            | -                                           | -                                           |
| <i>Acropora</i>         | 11          | 0                           | 0                            | -                                           | -                                           |
| <i>Oulastrea</i>        | 10          | 0                           | 0                            | -                                           | -                                           |
| <i>Pocillopora</i>      | 10          | 0                           | 0                            | -                                           | -                                           |
| <i>Herpolitha</i>       | 6           | 0                           | 0                            | -                                           | -                                           |
| <i>Acantastrea</i>      | 5           | 0                           | 0                            | -                                           | -                                           |
| <i>Psammocora</i>       | 2           | 0                           | 0                            | -                                           | -                                           |
| <i>Plerogyra</i>        | 2           | 0                           | 0                            | -                                           | -                                           |
| <i>Euphyllia</i>        | 2           | 0                           | 0                            | -                                           | -                                           |
| <b>Total</b>            | <b>2648</b> | <b>162</b>                  | <b>6.1</b>                   | <b>88</b>                                   | <b>74</b>                                   |

doi:10.1371/journal.pone.0159755.t001

*Pachyseris*, *Dipsastraea*, *Porites* and *Pectinia*) and Subar Darat (i.e. *Pachyseris*, *Porites*, *Dipsastraea* and *Pectinia*).

### Drivers of differential bleaching response

All the single-factor models (either size, site or genus) performed significantly better ( $p < 0.05$ ) than the null model and each model explained up to 19% of the total variation observed

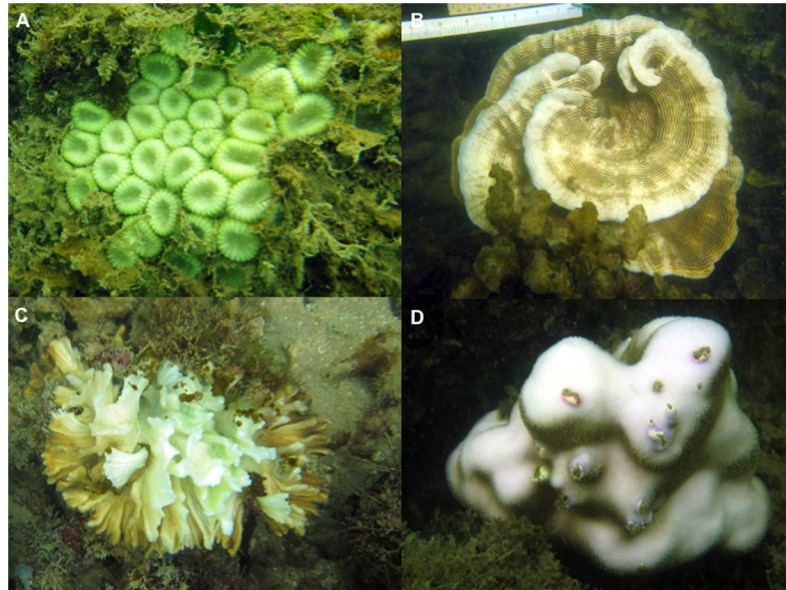

**Fig 2. Coral genera that had the most number of bleached colonies during the 2013 minor bleaching episode in Singapore.** Coral genera included (a) *Dipsastraea*, (b) *Pachyseris*, (c) *Pectinia* and (d) *Porites*.

doi:10.1371/journal.pone.0159755.g002

(Table 3). This indicated that all three factors were driving the bleaching patterns observed in this study. Among these single-factor models, size was the best predictor ( $R^2 = 0.19$ ), with larger colonies ( $29.44 \pm 23.74$  cm) more likely to bleach than the smaller ones ( $14.24 \pm 9.35$  cm) (Table 4). Among the four genera (see Table 1), *Pachyseris* was the most susceptible to bleaching (31%), followed by *Porites* (9.5%), *Pectinia* (6.4%) and *Dipsastraea* (4.7%). Of the seven sites (see S1 Table), the corals at Subar Darat (24.6%), Hantu (24.6%), Sultan Shoal North (18%) and Kusu (18%) were the most susceptible to bleaching, while Semakau (11%), Satumu (7.9%) and Sultan Shoal South (4.3%) were the least affected.

The multiple-factor models performed much better than single-factor ones—the best dual-factor model and tri-factor model accounted for up to 33% and 41% of the total variation respectively (Table 3). Models with a combination of extrinsic factor (site) and intrinsic factors (genus or size) were better than the model with only intrinsic factors (Table 3).

**Table 2. Bleaching response of coral colonies from seven study sites during a minor bleaching episode in Singapore in 2013.**

| Site               | <i>n</i> | Number of bleached colonies | Bleaching susceptibility (%) | Number of corals in Level 1 (<50% bleached) | Number of corals in Level 2 (>50% bleached) |
|--------------------|----------|-----------------------------|------------------------------|---------------------------------------------|---------------------------------------------|
| Sultan Shoal North | 242      | 30                          | 12.4                         | 11                                          | 19                                          |
| Hantu              | 349      | 41                          | 11.7                         | 25                                          | 16                                          |
| Subar Darat        | 235      | 27                          | 11.5                         | 23                                          | 4                                           |
| Kusu               | 317      | 19                          | 6                            | 12                                          | 7                                           |
| Semakau            | 474      | 20                          | 4.2                          | 7                                           | 13                                          |
| Sultan Shoal South | 476      | 12                          | 2.5                          | 6                                           | 6                                           |
| Satumu             | 555      | 13                          | 2.3                          | 8                                           | 5                                           |
| Total              | 2648     | 162                         | 6.1                          | 88                                          | 74                                          |

doi:10.1371/journal.pone.0159755.t002

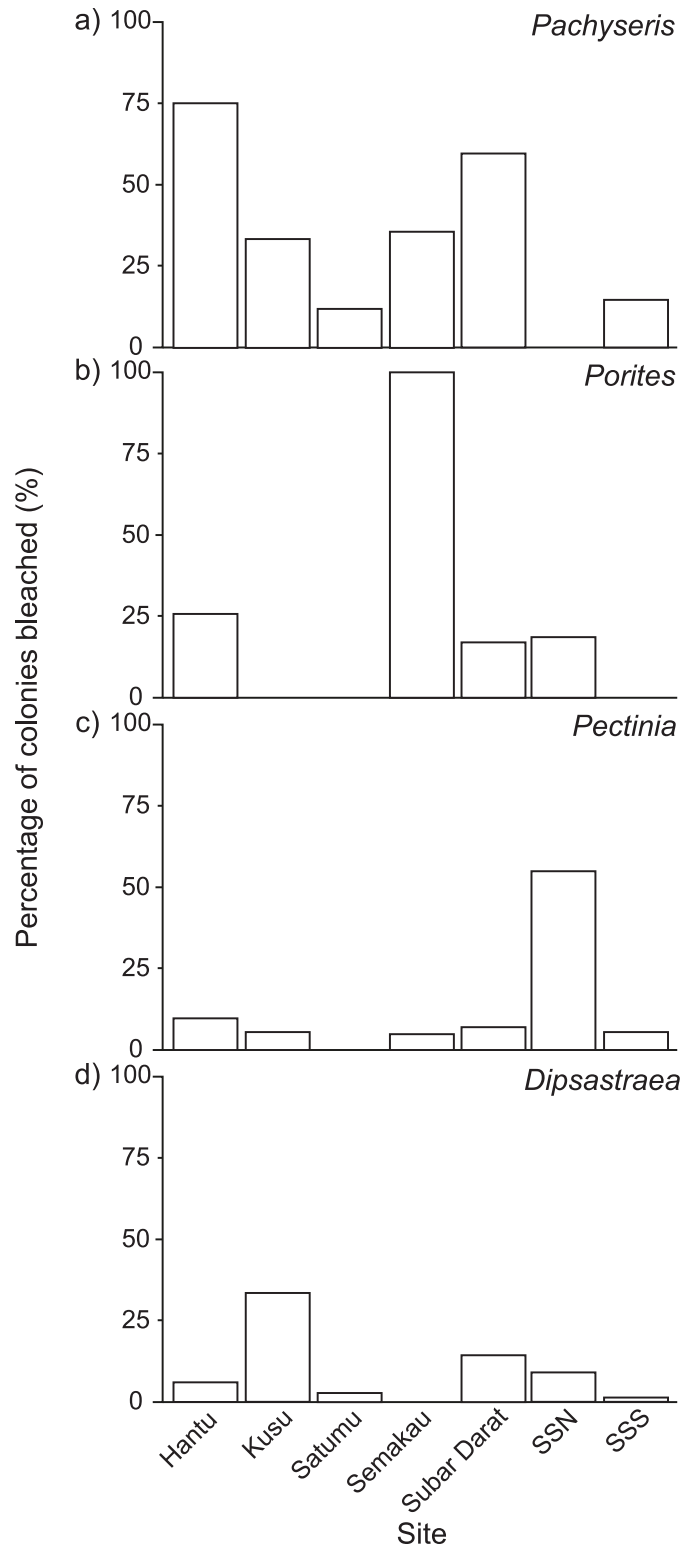

**Fig 3. Coral bleaching susceptibility across seven study sites during a minor bleaching episode in Singapore in 2013.** Four genera with the largest number of bleached colonies in each site are presented: (a) *Pachyseris*, (b) *Porites*, (c) *Pectinia* and (d) *Dipsastraea*. Corals of the genus *Pachyseris* were not recorded at Sultan Shoal North (SSS = Sultan Shoal South; SSN = Sultan Shoal North).

doi:10.1371/journal.pone.0159755.g003

**Table 3. Performances of logistic regression models using the independent variables: site, size and genera, to account for the observed bleaching responses.**

| Model <sup>a</sup>                                                     | AIC   | R <sup>2</sup> |
|------------------------------------------------------------------------|-------|----------------|
| Null                                                                   | 704.7 | 0              |
| Site                                                                   | 653.8 | 0.12           |
| Size                                                                   | 607.7 | 0.19           |
| Genus                                                                  | 616.3 | 0.18           |
| Site + Size                                                            | 540.8 | 0.33           |
| Site + Genus                                                           | 550.2 | 0.32           |
| Size + Genus                                                           | 580.0 | 0.25           |
| Site + Size + Genus                                                    | 493.8 | 0.41           |
| Site + Size + Genus + Site:Size + Site:Genus + Size:Genus <sup>b</sup> | 483.0 | 0.51           |

<sup>a</sup>All the models and the corresponding variables were significant at  $p = 0.05$  confidence level. Interaction between variables is denoted by a colon.

<sup>b</sup> Best model was chosen using the Akaike Information Criterion (AIC)

doi:10.1371/journal.pone.0159755.t003

When interactions among all three factors were considered, the best model that took into account all possible pairwise interactions accounted for 10% more variation than the best non-interaction model (Table 3). Apart from the interaction between size and site, other interactions contributed significantly ( $p < 0.05$ ) to the model.

## Discussion

Severe thermal stress leading to major bleaching events has been linked to large-scale coral mortality [5] and a rapid loss of reef ecosystem function [2]. Thermal stress events that are milder can also cause bleaching across reefs, albeit on a smaller scale [16]. Even though the elevation in sea surface temperatures in Singapore between June and July 2013 was lower than the bleaching threshold temperature (31°C) [23], coral bleaching was observed at numerous off-shore reefs, and the affected coral colonies surveyed exhibited varying degrees of bleaching at all sites. The current study demonstrated that even during minor episodes, bleaching response can vary with coral genus, site and colony size. More importantly, the findings underscore the immense complexity in predicting coral bleaching responses.

Our results deviate from general perceptions of the susceptibility of coral genera to thermally-induced bleaching. Genera such as *Pocillopora* and *Acropora* have been widely deemed as the most susceptible to thermal stress, as were observed from previous bleaching events across the world [6,32,33]. However, none of the *Acropora* and *Pocillopora* colonies bleached in the present study. Instead, massive corals from the genera *Goniastrea*, *Platygyra* and *Porites* which are usually moderately susceptible to thermal stress [7,14], were among the most affected during this bleaching episode. This atypical trend in bleaching susceptibility was

**Table 4. Mean maximum diameter ( $\pm$  SD) of the corals from the four genera with the most number of bleached colonies.**

| Genus              | Unbleached colonies (cm) | Bleached colonies (cm) | Overall (cm)      |
|--------------------|--------------------------|------------------------|-------------------|
| <i>Dipsastraea</i> | 11.76 $\pm$ 6.72         | 16.00 $\pm$ 5.68       | 11.95 $\pm$ 6.73  |
| <i>Pachyseris</i>  | 21.33 $\pm$ 14.26        | 37.87 $\pm$ 27.61      | 26.95 $\pm$ 21.27 |
| <i>Pectinia</i>    | 12.82 $\pm$ 7.18         | 17.04 $\pm$ 6.24       | 13.09 $\pm$ 7.19  |
| <i>Porites</i>     | 15.69 $\pm$ 8.73         | 20.00 $\pm$ 8.37       | 16.14 $\pm$ 8.75  |
| Overall (cm)       | 14.24 $\pm$ 9.35         | 29.44 $\pm$ 23.74      | 16.12 $\pm$ 13.06 |

doi:10.1371/journal.pone.0159755.t004



similarly observed from the 2010 major bleaching event in Singapore and Peninsular Malaysia [14]. Thermal stress events, such as those in 1998 and 2010, might exert tremendous selection pressure on coral populations by eliminating thermally susceptible colonies and facilitating the propagation of tolerant ones [13]. Since genera such as *Acropora* grow fast and achieve sexual maturity early, they can adapt rapidly to environmental change [34].

As the coral assemblages among sites were not dissimilar, the spatial variations in scleractinian diversity were unlikely to have influenced the differences in bleaching responses, unlike those observed from other studies [6]. Instead, the differences observed in this study indicate that extrinsic factors are crucial drivers of site-specific bleaching patterns. Corals at sites such as Satumu and Semakau were less affected by thermal stress than others, even though all study sites are at most 23 km apart and hence relatively near to each other. The most striking difference was observed at Sultan Shoal, where the northern reef had the highest bleaching susceptibility of all sites (12%) while the southern reef was one of the least affected (2.5%). From *in situ* measurements obtained in 2014, the 2013 bleaching patterns at some sites appeared to be driven by water flow. High water motion can dissipate heat along the colony surfaces faster and was reported to be effective in reducing thermal stress to corals [11]. Similar to a previous study (Taira *et al.*, In review), the reef at Kusu was consistently exposed to higher water motion and had lower bleaching susceptibility than those at Sultan Shoal. The results however indicate that it is insufficient to attribute water flow as the only abiotic driver in bleaching response. For instance, the reef at Hantu was subjected to faster water flow than Sultan Shoal North, but both sites were similarly affected by bleaching, while both sites at Sultan Shoal had registered similar sedimentation rates and turbidity but elicited different bleaching responses (Unpublished data).

It is thus evident that the myriad factors driving coral bleaching responses cannot be adequately addressed independently. For instance, although the larger colonies were more affected by bleaching, as was also reported from other studies [7,8], colony size only accounted for 19% of the total variation in this study. In addition, the order of genus-specific bleaching susceptibility differed substantially among sites. For example, the order of bleaching susceptibility at Sultan Shoal North was radically different from Sultan Shoal South, Hantu and Subar Darat. Eventually, the regression model that fit best was one that incorporated size, genus and site, as well as the corresponding interactions in the analyses. Such interactions are not unexpected, as there have been observations that corals in deeper reefs were less susceptible to bleaching [6]. Our results highlight the generalization of current perceptions of bleaching susceptibility, as it is apparent that corals can respond differently when the various factors are examined in concert.

The present study underscores the importance of re-evaluating the conventional paradigm of “winners” and “losers” during bleaching events. Coral genera (e.g. *Pachyseris* and *Podabacia*) that may have been less impacted by thermal stress during previous bleaching events in Singapore were instead most affected during the 2013 minor bleaching episode. In sharp contrast, coral genera generally perceived as most vulnerable (e.g. *Acropora* and *Pocillopora*), fared better. Clearly, it is essential to monitor coral assemblages during both minor and major bleaching episodes to provide a more comprehensive evaluation of bleaching response in an era of climate change [35,36]. However, factors such as coral taxa or site [7,14] which are used commonly as predictors of bleaching susceptibility appear to gloss over other critical drivers of bleaching response, while other considerations (e.g. depth, water flow, sedimentation) are usually not examined in detail. The paucity of factors investigated thus impedes the coherent and systematic understanding of coral bleaching responses [37] and highlights the inadequacy of current monitoring methods. While there are resource constraints in reef monitoring [38,39], our findings demonstrate that all three factors examined in this study (genus, site and size) are

important in augmenting the bleaching response prediction model and we strongly recommend that these factors be incorporated as part of future bleaching monitoring efforts.

## Supporting Information

**S1 Table. Bleaching response among sites and genera.** Total number of corals recorded in all seven sites and the corresponding bleaching prevalence for each genera (SS = Sultan Shoal). (PDF)

## Acknowledgments

We would like to express our gratitude to Dr. Danwei Huang (Department of Biological Sciences, NUS) for his advice on the coral taxonomy, and Dr. Kwek Yan Chong (Department of Biological Sciences, NUS) and Dr. Alex Thiery (Department of Statistics and Applied Probability, NUS) for their advice on statistical analyses. This study is part of the project “Enhancing Singapore’s Coral Reef Ecosystem in a Green Port” supported by the Maritime and Port Authority of Singapore.

## Author Contributions

Conceived and designed the experiments: LMC TCT KBT PC. Performed the experiments: LMC TCT KBT PC LAR DT RCPD HXL AK JL. Analyzed the data: LMC TCT KBT CSLN PC. Contributed reagents/materials/analysis tools: LMC TCT KBT PC. Wrote the paper: LMC TCT KBT CSLN PC LAR DT RCPD HXL AK JL EG KT TS.

## References

1. Hoegh-Guldberg O (1999). Climate change, coral bleaching and the future of the world’s coral reefs. *Mar FreshwRes* 50: 839–866.
2. Hoegh-Guldberg O, Mumby PJ, Hooten AJ, Steneck RS, Greenfield P, Gomez E, et al. (2007). Coral reefs under rapid climate change and ocean acidification. *Science* 318: 1737–1742. PMID: [18079392](#)
3. Takahashi S, Nakamura T, Sakamizu M, van Woesik R, Yamasaki H. (2004). Repair machinery of symbiotic photosynthesis as the primary target of heat stress for reef-building corals. *Plant Cell Physiol* 45 (2): 251–255. PMID: [14988497](#)
4. Grottoli AG, Rodrigues LJ, Palardy JE (2006). Heterotrophic plasticity and resilience in bleached corals. *Nature* 440(7088): 1186–1189. PMID: [16641995](#)
5. Berkelmans R, Oliver JK (1999). Large-scale bleaching of corals on the Great Barrier Reef. *Coral Reefs* 18: 55–66.
6. Marshall PA, Baird AH (2000). Bleaching of corals on the Great Barrier Reef: differential susceptibilities among taxa. *Coral Reefs* 19: 155–163.
7. Loya Y, Sakai K, Yamazato K, Nakano Y, Sambali H, van Woesik R. (2001). Coral bleaching: the winners and the losers. *Ecol Lett* 4: 122–131.
8. Bena C, van Woesik R (2004). The impact of two bleaching events on the survival of small coral colonies (Okinawa, Japan). *Bull Mar Sci* 75: 115–126.
9. Kleypas JA, Danabasoglu G, Lough JM (2008). Potential role of the ocean thermostat in determining regional differences in coral reef bleaching events. *Geophysical Research Letters* 35(3).
10. Mumby PJ, Chisholm JR, Edwards AJ, Andrefouet S, Jaubert J (2001). Cloudy weather may have saved Society Island reef corals during the 1998 ENSO event. *Mar Ecol Prog Ser* 222: 209.
11. Nadaoka K, Nihei Y, Wakaki K, Kumano R, Kakuma S, Moromizao S, et al. (2001). Regional variation of water temperature around Okinawa coasts and its relationship to offshore thermal environments and coral bleaching. *Coral Reefs* 20: 373–384.
12. Nakamura T, van Woesik R (2001). Water-flow rates and passive diffusion partially explain differential survival of corals during the 1998 bleaching event. *Mar Ecol Prog Ser* 212: 301–304.
13. Thompson DM, van Woesik R (2009). Corals escape bleaching in regions that recently and historically experienced frequent thermal stress. *Proc R Soc Lond, B* 276: 2893–2901.

14. Guest JR, Baird AH, Maynard JA, Muttaqin E, Edwards AJ, Campbell SJ, et al. (2012). Contrasting patterns of coral bleaching susceptibility in 2010 suggest an adaptive response to thermal stress. *PLoS ONE* 7(3): e33353. doi: [10.1371/journal.pone.0033353](https://doi.org/10.1371/journal.pone.0033353) PMID: [22428027](https://pubmed.ncbi.nlm.nih.gov/22428027/)
15. Darling ES, McClanahan TR, Côté IM (2010). Combined effects of two stressors on Kenyan coral reefs are additive or antagonistic, not synergistic. *Conserv Lett* 3(2): 122–130.
16. Manzello DP, Berkemans R, Hendee JC (2007). Coral bleaching indices and thresholds for the Florida reef tract, Bahamas, and St. Croix, US Virgin Islands. *Mar Poll Bull* 54(12): 1923–1931.
17. Wagner DE, Kramer P, van Woesik R (2010). Species composition, habitat, and water quality influence coral bleaching in southern Florida. *Mar Ecol Prog Ser* 408: 65–78.
18. Chou LM (1988). Community structure of sediment-stressed reefs in Singapore. *Galaxea, Journal of Coral Reef Studies* 7: 101–111.
19. Dikou A, Van Woesik R (2006). Survival under chronic stress from sediment load: spatial patterns of hard coral communities in the southern islands of Singapore. *Mar Poll Bull* 52(1): 7–21.
20. Browne NK, Tay JK, Low J, Larson O, Todd PA. (2015). Fluctuations in coral health of four common inshore reef corals in response to seasonal and anthropogenic changes in water quality. *Mar Environ Res* 105: 39–52. doi: [10.1016/j.marenvres.2015.02.002](https://doi.org/10.1016/j.marenvres.2015.02.002) PMID: [25682391](https://pubmed.ncbi.nlm.nih.gov/25682391/)
21. Huang D, Tun KP, Chou LM, Todd PA (2009). An inventory of zooxanthellate scleractinian corals in Singapore, including 33 new records. *Raff Bull Zool* 22: 69–80.
22. Tun K, Chou LM, Low J, Yeemin T, Phongsuwan N, Setiasih N, et al. (2011). The 2010 coral bleaching event in Southeast Asia—A regional overview. 22nd Pacific Science Congress.
23. National Oceanic and Atmospheric Administration Coral Reef Watch (2000) NOAA Coral Reef Watch 50-km Satellite Virtual Station Time Series Data, updated twice-weekly, for Singapore, January 1, 2012–December 31, 2013. Silver Spring, Maryland, USA: NOAA Coral Reef Watch. Data set accessed 2013-10-5 at <http://coralreefwatch.noaa.gov/satellite/vs/index.php>.
24. Veron JEN (2000). *Corals of the World*, vol. 1–3. Australian Institute of Marine Science, Townsville.
25. Wallace CC, Done BJ, Muir PR (2012). Revision and catalogue of worldwide staghorn corals *Acropora* and *Isopora* (Scleractinia: Acroporidae) in the Museum of Tropical Queensland. *Memoirs of the Queensland Museum, Nature*. Queensland Museum
26. Benzoni F, Stefani F, Pichon M, Galli P (2010). The name game: morpho-molecular species boundaries in the genus *Psammocora* (Cnidaria, Scleractinia). *Zool J Linn Soc* 160: 421–456.
27. Budd AF, Fukami H, Smith ND, Knowlton N (2012). Taxonomic classification of the reef coral family *Mussidae* (Cnidaria: Anthozoa: Scleractinia). *Zool J Lin Soc* 166: 465–529.
28. Huang D, Benzoni F, Fukami H, Knowlton N, Smith ND, Budd AF (2014). Taxonomic classification of the reef coral families *Merulinidae*, *Montastraeidae*, and *Diploastraeidae* (Cnidaria: Anthozoa: Scleractinia). *Zool J Lin Soc* 171: 277–355.
29. Gittenberger A, Reijnen BT, Hoeksema BW (2011). A molecularly based phylogeny reconstruction of mushroom corals (Scleractinia: Fungiidae) with taxonomic consequences and evolutionary implications for life history traits. *Contrib Zool* 80: 107–132.
30. Hoeksema BW (2009). Attached mushroom corals (Scleractinia: Fungiidae) in sediment-stressed reef conditions in Singapore, including a new species and a new record. *Raff Bull Zool Suppl.* 22: 81–90.
31. van Woesik R, Houk P, Isechal AL, Idechong JW, Victor S, Golbuu Y (2012). Climate-change refugia in the sheltered bays of Palau: analogs of future reefs. *Ecol Evol* 2: 2474–248. doi: [10.1002/ece3.363](https://doi.org/10.1002/ece3.363) PMID: [23145333](https://pubmed.ncbi.nlm.nih.gov/23145333/)
32. McClanahan TR, Baird AH, Marshall PA, Toscano MA (2004). Comparing bleaching and mortality responses of hard corals between southern Kenya and the Great Barrier Reef, Australia. *Mar Poll Bull* 48(3): 327–335.
33. Edwards AJ, Clark S, Zahir H, Rajasuriya A, Naseer A, Rubens J (2001). Coral bleaching and mortality on artificial and natural reefs in Maldives in 1998, sea surface temperature anomalies and initial recovery. *Mar Poll Bull* 42(1): 7–15.
34. Baird A, Maynard JA (2008). Coral adaptation in the face of climate change. *Science* 320: 315–316. doi: [10.1126/science.320.5874.315](https://doi.org/10.1126/science.320.5874.315) PMID: [18420915](https://pubmed.ncbi.nlm.nih.gov/18420915/)
35. Grigg RW, Hey R (1992). Paleooceanography of the tropical eastern Pacific Ocean. *Science* 255(5041): 172. PMID: [17756067](https://pubmed.ncbi.nlm.nih.gov/17756067/)
36. Hoegh-Guldberg O (2009). Climate change and coral reefs: Trojan horse or false prophecy? *Coral Reefs* 28(3): 569–575.
37. Douglas AE (2003). Coral bleaching—how and why?. *Mar Poll Bull* 46(4): 385–392.

38. Toh TC, Ng CS, Peh JW, Toh KB, Chou LM (2014). Augmenting the post-transplantation growth and survivorship of juvenile scleractinian corals via nutritional enhancement. *PLoS ONE* 9(6):e98529. doi: [10.1371/journal.pone.0098529](https://doi.org/10.1371/journal.pone.0098529) PMID: [24896085](https://pubmed.ncbi.nlm.nih.gov/24896085/)
39. Ng CS, Toh TC, Chou LM (2016). Coral restoration in Singapore's sediment-challenged sea. *Regional Studies in Marine Science*.
